# Supplementary material
Source: PubMed Central journal article supplement (PMC2765664)

# Supporting Information for

## “Chloroquine Transport in *Plasmodium falciparum* I: Influx and Efflux Kinetics for Live Trophozoite Parasites using a Novel Fluorescent Chloroquine Probe”

Mynthia Cabrera,<sup>‡</sup> Jayakumar Natarajan,<sup>‡</sup> Michelle Paguio,<sup>‡</sup> Christian Wolf,<sup>‡,⊥</sup> Jeffrey

Urbach<sup>||</sup> and Paul D. Roepke<sup>‡,§,||,⊥,\*</sup>

Department of Chemistry<sup>‡</sup>, Department of Biochemistry and Cellular & Molecular Biology<sup>§</sup>, Department of Physics<sup>||</sup> and Center for Infectious Diseases<sup>⊥</sup>

### FIGURE S1: Synthetic methods

**General.** All reagents and solvents were commercially available and used without further purification. Flash chromatography was performed on Kieselgel 60, particle size 0.032-0.063 mm. NMR spectra were obtained on a 300 MHz (<sup>1</sup>H-NMR) and 75 MHz (<sup>13</sup>C-NMR) Varian FT-NMR spectrometer using CDCl<sub>3</sub> as solvent. Electrospray mass spectra (ESI-MS) were collected on a Thermo Finnigan LCQ instrument. Samples were dissolved in acetonitrile/water (1:1 v/v) containing 1% acetic acid (1 mg/mL) for MS analysis.

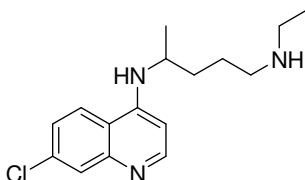

**Monodesethylchloroquine (4).** Monodesethylchloroquine was synthesized by following a procedure reported in the literature.<sup>1</sup> <sup>1</sup>H-NMR (300 MHz, CDCl<sub>3</sub>) δ = 1.13 (t, *J* = 6.9 Hz, 3H), 1.31 (d, *J* = 6.3 Hz, 3H), 1.50-1.86 (m, 4H), 2.60-2.74 (m, 4H), 3.72 (m, 1H), 5.52 (bd, *J* = 5.8 Hz, 1H), 6.39 (d, *J* = 5.4 Hz, 1H), 7.33 (dd, *J* = 2.4 Hz, 8.7 Hz, 1H), 7.69 (d, *J* = 8.7 Hz, 1H), 7.93 (d, *J* = 2.4 Hz, 1H), 8.50 (d, *J* = 5.4 Hz, 1H); <sup>13</sup>C-NMR (75 MHz, CDCl<sub>3</sub>) δ = 15.0, 19.9, 26.3, 33.9, 44.0, 48.2, 49.1, 98.9, 117.3, 121.4, 124.7, 128.4, 134.5, 149.1, 149.2, 151.7.

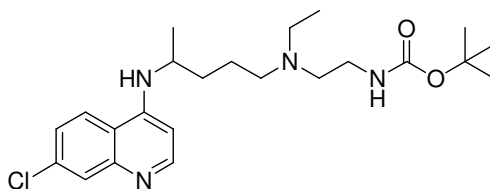

***N*-(7-Chloro-4-quinolyl)-*N'*-ethyl-*N''*-(*N''*-*t*-Boc-aminoethyl)-1,4-diaminopentane (5).**

A mixture of desethylchloroquine **4** (0.34 g, 1.15 mmol, 1 equiv.), *N*-*t*-Boc-glycinal **3** (0.55 g, 3.45 mmol, 3 equiv.) and a catalytic amount of AcOH was stirred in 10 mL of methanol at room temperature for 15 minutes (*N*-*t*-Boc-glycinal **3** was synthesized following a procedure reported in the literature).<sup>2</sup> Then, NaCNBH<sub>3</sub> (0.22 g, 3.45 mmol, 3 equiv.) was added and the reaction mixture was heated to reflux overnight. After cooling, 1 mL of water was added and methanol was removed *in vacuo*. The residue was dissolved in CH<sub>2</sub>Cl<sub>2</sub> and extracted with saturated NaHCO<sub>3</sub>. The combined organic layers were evaporated under reduced pressure and the residue was purified by flash chromatography using MeOH/CH<sub>2</sub>Cl<sub>2</sub> (1:9) as the mobile phase. After gradually increasing the concentration of MeOH to 30%, 0.33 g (0.76 mmol, 65% yield) of a yellow oil was obtained. <sup>1</sup>H-NMR (300 MHz, CDCl<sub>3</sub>) δ = 1.00 (t, *J* = 6.9 Hz, 3H), 1.33 (d, *J* = 6.3 Hz, 3H), 1.42 (s, 9H), 1.50-1.82 (m, 4H), 2.40-2.62 (m, 6H), 3.16 (m, 2H), 3.73 (m, 1H), 4.99 (bs, 1H), 5.22 (m, 1H), 6.41 (d, *J* = 5.4 Hz, 1H), 7.34 (dd, *J* = 9.0 Hz, 1.8 Hz, 1H), 7.76 (d, *J* = 9.0 Hz, 1H), 7.94 (d, *J* = 1.8 Hz, 1H), 8.49 (d, *J* = 5.4 Hz, 1H); <sup>13</sup>C-NMR (75 MHz, CDCl<sub>3</sub>) δ = 11.3, 20.2, 23.7, 28.3, 34.2, 38.1, 47.4, 48.3, 52.5, 53.0, 79.1, 99.0, 117.1, 121.2, 125.1, 128.2, 134.9, 148.7, 149.2, 151.4, 156.0.

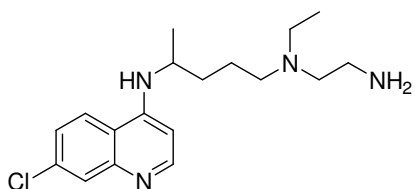

***N*-(7-Chloro-4-quinolyl)-*N'*-ethyl-*N''*-(*N''*-aminoethyl)-1,4-diaminopentane (6).** To a solution of *N*-(7-chloro-4-quinolyl)-*N'*-ethyl-*N''*-(*N''*-*t*-Boc-aminoethyl)-1,4-diaminopentane **5** (0.17 g, 0.39 mmol, 1 equiv.) in MeOH, 2M HCl in Et<sub>2</sub>O (1.5 mL, 3.0 mmol, 7.7 equiv.) was added and allowed to stir overnight at room temperature. Methanol was removed *in vacuo* and the residue was dissolved in CH<sub>2</sub>Cl<sub>2</sub>, extracted with 1N NaOH solution and the combined organic layers were removed under reduced pressure. Flash chromatography (2% Et<sub>3</sub>N/MeOH) gave 0.1 g (0.3 mmol, 78% yield) of a yellow oil. <sup>1</sup>H-NMR (300 MHz, CDCl<sub>3</sub>/CD<sub>3</sub>OD) δ = 0.95 (t, *J* = 6.9 Hz, 3H), 1.27 (d, *J* = 6.3 Hz, 3H), 1.42-1.76 (m, 4H), 2.35-2.54 (m, 6H), 2.55-2.75 (m, 5H), 3.66 (m, 1H), 6.36 (d, *J* = 5.7 Hz, 1H), 7.31 (dd, *J* = 9.0 Hz, 2.1 Hz, 1H), 7.81 (d, *J* = 9.0 Hz), 7.84 (d, *J* = 2.1 Hz, 1H), 8.37 (d, *J* = 5.7 Hz, 1H); <sup>13</sup>C-NMR (75 MHz, CDCl<sub>3</sub>) δ = 11.5, 20.1, 23.8, 34.0, 39.4, 47.4, 48.1, 53.1, 55.9, 98.9, 117.1, 121.2, 124.7, 128.4, 134.4, 149.0, 149.1, 151.7.

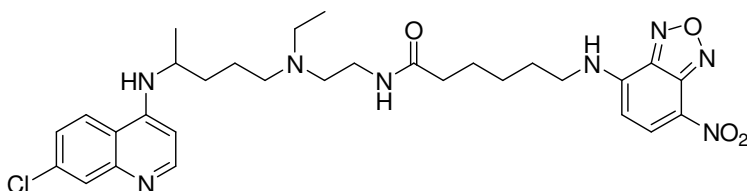

***N*-(7-Chloro-4-quinolyl)-*N'*-ethyl-*N''*-(*N''*-6'-(7-nitro-2,1,3-benzoxadiazol-4-amino)hexanamidoethyl)-1,4-diaminopentane (1).** A mixture *N*-(7-Chloro-4-quinolyl)-*N'*-ethyl-*N''*-(*N''*-aminoethyl)-1,4-diaminopentane **6** (0.055 g, 0.164 mmol, 1.28 equiv.) and succinimidyl 6-*N*-[4-(7-nitrobenz-2-oxa-1,3-diazol)]aminohexanoate **7** (0.050 g, 0.128

mmol, 1 equiv.) in CH<sub>2</sub>Cl<sub>2</sub> were stirred at room temperature for 1 h. The reaction mixture was extracted with water and CH<sub>2</sub>Cl<sub>2</sub> and the combined organic layers were evaporated under reduced pressure. Flash chromatography (1:1 MeOH/CH<sub>2</sub>Cl<sub>2</sub>) gave 0.066 g (0.11 mmol, 85% yield) of a dark red oil. <sup>1</sup>H-NMR (300 MHz, CDCl<sub>3</sub>) δ = 1.00 (t, *J* = 6.9 Hz, 3H), 1.26-1.40 (m, 5H), 1.50-1.80 (m, 8H), 2.02 (t, *J* = 7.2 Hz, 2H), 2.44-2.60 (m, 6H), 3.29 (m, 2H), 3.46 (m, 2H), 3.73 (m, 1H), 5.06 (d, *J* = 7.5 Hz, 1H), 6.05 (bs, 1H), 6.12 (d, *J* = 8.7 Hz, 1H), 6.42 (d, *J* = 5.7 Hz, 1H), 7.34 (dd, *J* = 9.0 Hz, 2.4 Hz, 1H), 7.71 (d, *J* = 9.0 Hz, 1H), 7.91 (d, *J* = 2.4 Hz, 1H), 8.45 (d, *J* = 8.7 Hz, 1H), 8.50 (d, *J* = 5.7 Hz, 1H); <sup>13</sup>C-NMR (75 MHz, CDCl<sub>3</sub>) δ = 11.7, 20.6, 24.0, 24.8, 26.5, 28.0, 34.4, 36.1, 37.1, 43.9, 47.7, 48.6, 52.3, 53.2, 98.8, 99.3, 117.4, 121.4, 123.4, 125.4, 128.6, 135.2, 136.9, 144.2, 144.5, 144.7, 149.3, 152.0, 172.9; MS (ESI) *m/z* calcd for C<sub>30</sub>H<sub>39</sub>ClN<sub>8</sub>O<sub>4</sub> 610.3. Found (M + H)<sup>+</sup>: 611.2.

### References:

- 1) Ansari, A. M.; Craig, J. C. A Convenient, Short Synthesis of Desthylchloroquine [7-Chloro-4-(4'-ethylamino-1'-methyl-butylamino)quinoline]. *Synthesis* **1995**, 147-149.
- 2) Myers, M. C.; Pokorski, J. K.; Appella D. H. Peptide Nucleic Acids with a Flexible Secondary Amine in the Backbone Maintain Oligonucleotide Binding Affinity. *Org. Lett.* **2004**, 6, 4699-4702.

FIGURE S2: NMR Spectra of NBD-CQ and intermediates  
 $^1\text{H}$ -NMR (300 MHz,  $\text{CDCl}_3$ ) and  $^{13}\text{C}$ -NMR (75 MHz,  $\text{CDCl}_3$ ) of *N*-(7-chloro-4-quinolyl)-*N'*-ethyl-*N''*-(*N''*-6'-(7-nitro-2,1,3-benzooxadiazol-4-amino)hexanamidoethyl)-1,4-diaminopentane (**1**)

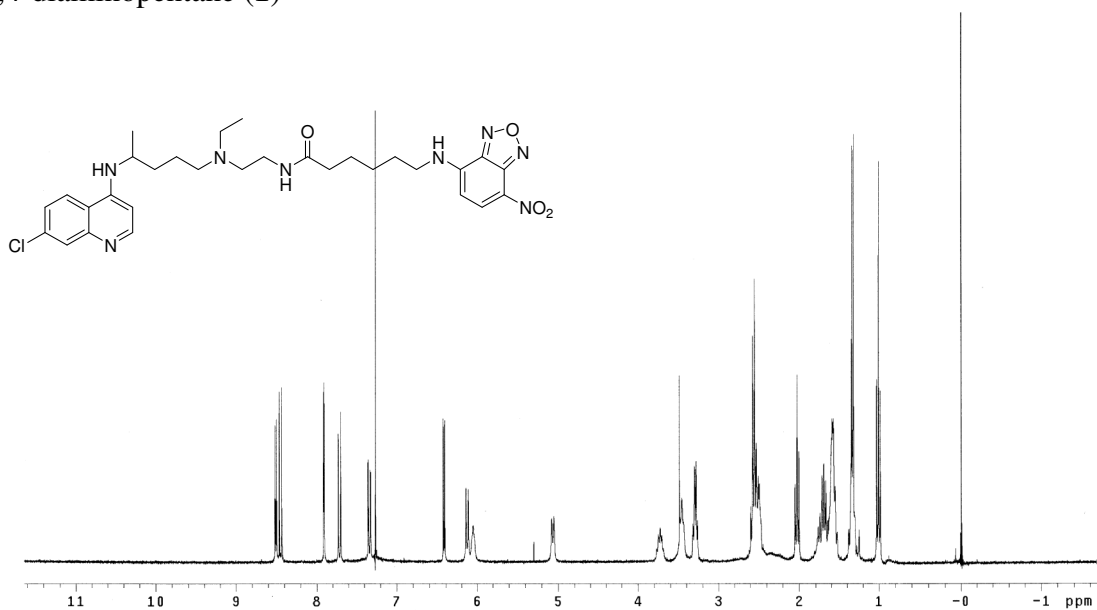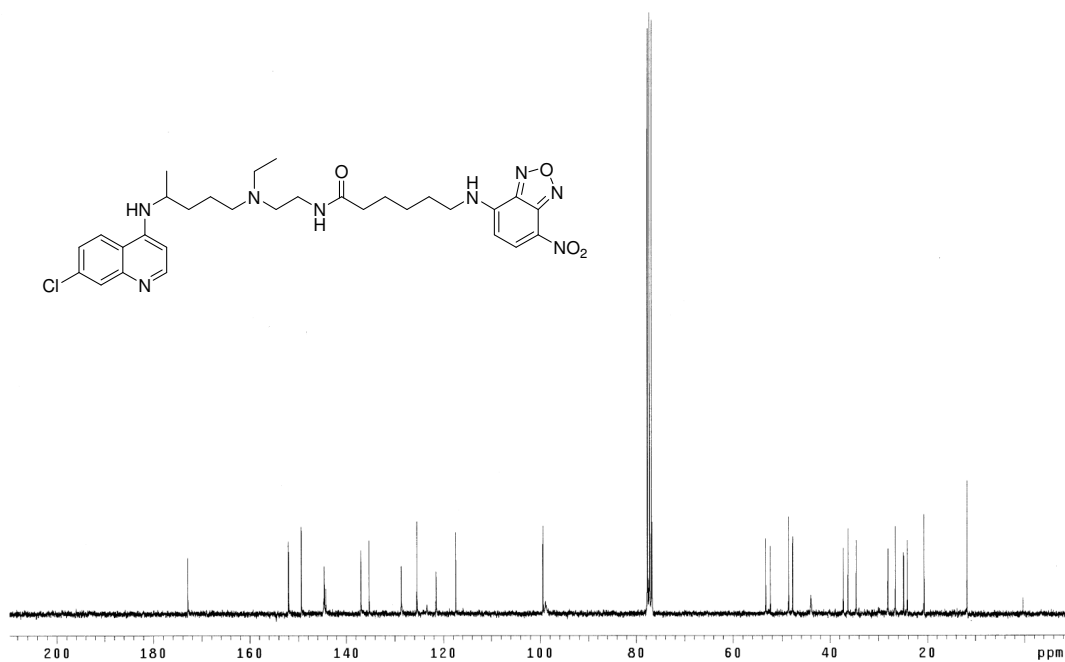

FIGURE S3: HPLC analysis of *N*-(7-chloro-4-quinolyl)-*N'*-ethyl-*N''*-(*N''*-6'-(7-nitro-2,1,3-benzooxadiazol-4-amino)hexanamidoethyl)-1,4-diaminopentane (**1**)

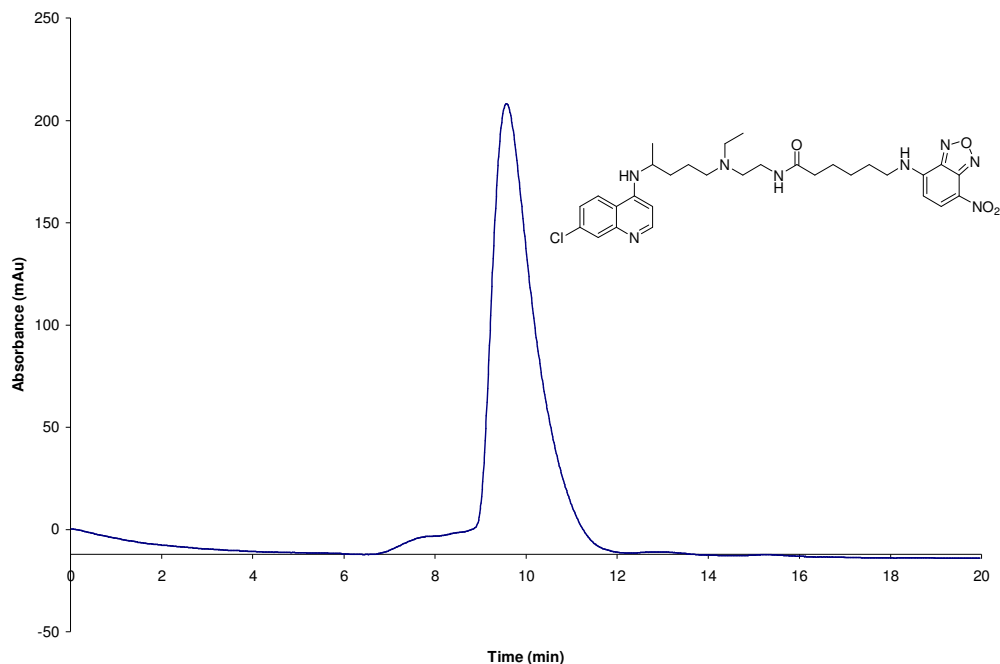

Conditions: C18 column (YMC-ODS-AQ), mobile phase: 20% acetonitrile, 70% water containing 0.1% trifluoroacetic acid, injection volume: 20  $\mu$ l, concentration: 0.5 mg/mL, UV detection: 254 nm, flow rate: 1 mL/min

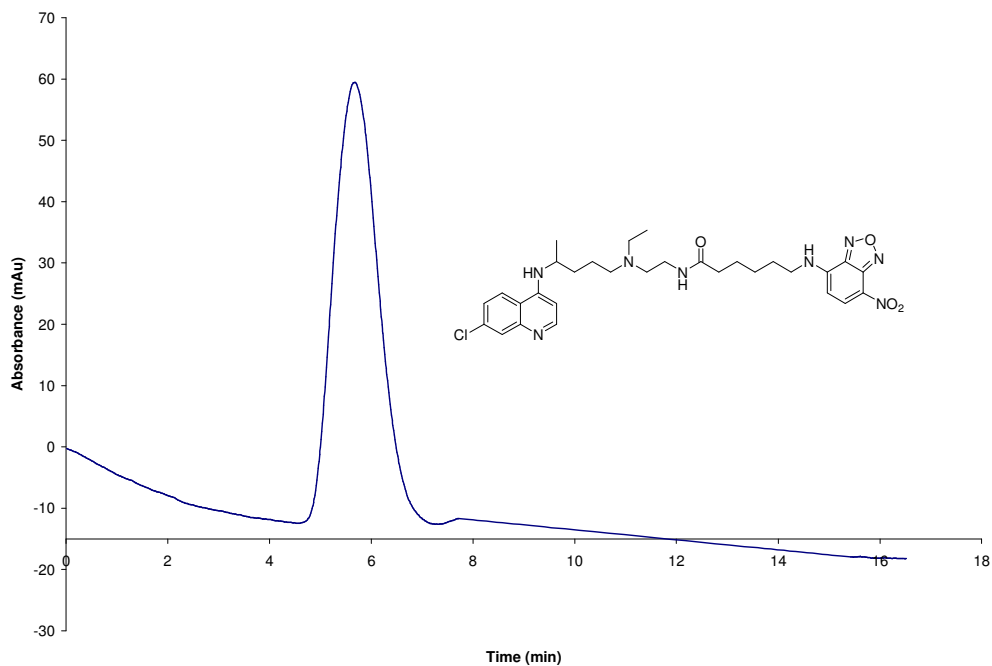

Conditions: Nucleosil NH<sub>2</sub> column (Alltech applied science), mobile phase: 80% acetonitrile, 20% water containing 0.1% trifluoroacetic acid, injection volume: 10  $\mu$ l, concentration: 0.5 mg/mL, UV detection: 254 nm, flow rate: 1 mL/min

FIGURE S4: Fluorescence spectra

(Left) 1  $\mu\text{M}$  NBD-CQ excitation scan from 415 nm to 530 nm (dashed line), and emission scan from 485 nm to 650 nm (solid line). Excitation  $\lambda_{\text{max}} = 470$  nm and emission  $\lambda_{\text{max}} = 550$  nm. 3 ml of a 1  $\mu\text{M}$  NBD-CQ in 10 mM MES-Tris pH 6.5 buffer was used for scanning excitation and emission using a PTI Alphascan Fluorometer.

(Right) 100 nM NBD-CQ in pH 5.5 ( $\square$ ), 6.5 ( $\Delta$ ) and 8.5 ( $\circ$ ). Inset is an expansion for NBD-CQ concentrations less than 1  $\mu\text{M}$ .

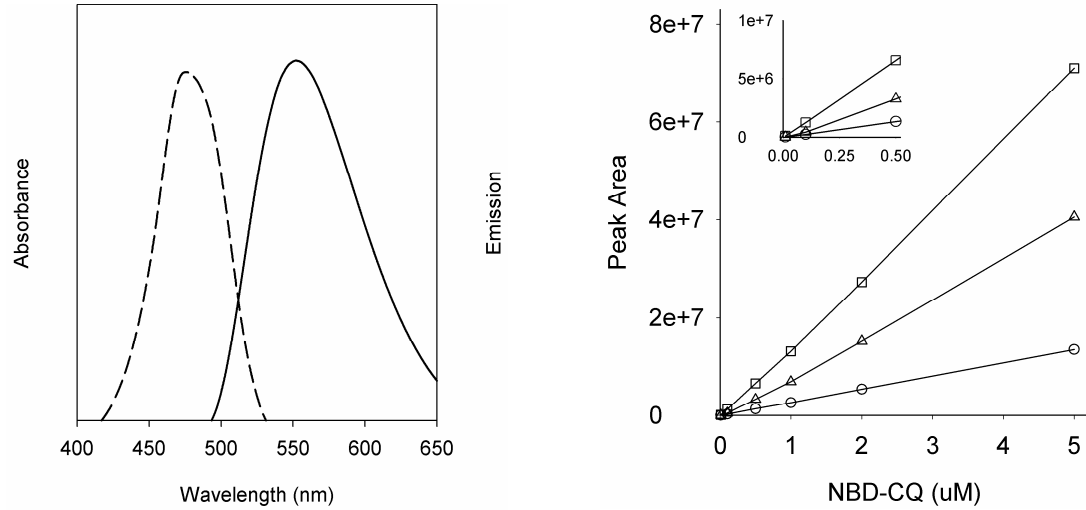

FIGURE S5: Thin layer calibration of NBD-CQ

Thin layer NBD-CQ calibration in 25 mM MES-Tris pH 5.2 ( $\blacktriangledown$ ) and 5.6 ( $\Delta$ ).

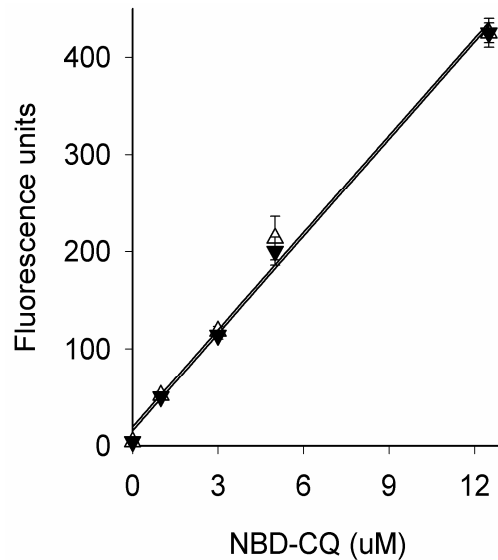

Supplement: NIHMS146267-supplement-1_si_001.pdf [file NIHMS146267-supplement-1_si_001.pdf]
